# Supplementary material for: The Association of Breakfast Frequency and Cardiovascular Disease (CVD) Risk Factors among Adolescents in Malaysia
Source: PubMed Central journal article supplement (PMC6567224; doi:10.3390/nu11050973), 2019-04-28
Supplement: nutrients-11-00973-s001.pdf [file nutrients-11-00973-s001.pdf]

Supplementary table: Food groups and their contents (% reported is the proportion of specific food items out of all items reported consumed for breakfast in that group).

| <b>Food Group name</b>          | <b>Contents</b>                                                                           |
|---------------------------------|-------------------------------------------------------------------------------------------|
| Cereal based mixed meals        | rice in coconut milk (34%), fried rice (30%), fried rice noodles (12%)                    |
| Chocolate and confectionery     | granulated sugar (99%)                                                                    |
| Hot and powdered drinks         | milo (40%), malted milk powder (38%), coffee powder (5%)                                  |
| High fat milk and cream         | sweetened condensed milk (91%), full cream milk (6%)                                      |
| Bread                           | white bread (99%)                                                                         |
| Other bread products            | Indian flatbread (49%), cream crackers (21%)                                              |
| Rice, pasta and other grains    | cooked rice (84%)                                                                         |
| Egg and egg dishes              | fried eggs (64%), whole egg (32%)                                                         |
| Spreads                         | egg jam (55%), strawberry jam (18%), peanut butter (11%)                                  |
| Biscuits and cakes              | chocolate cream bread (30%), corn cream bread (11%), vanilla cream bread (8%)             |
| Malaysian kuih (high ED>11.2)   | currypuff (50%), doughnuts (24%)                                                          |
| Sauces (high ED > 10 kJ/g)      | gravy (75%), chilli paste (11%)                                                           |
| Fish high fat (>4.6g)           | fried mackerel (27%), dried fried anchovies (17%)                                         |
| Meat and poultry                | fried chicken (65%), chicken breast (25%)                                                 |
| Sauces (low ED < 10 kJ/g)       | chilli sauce (62%), sweet soy sauce (20%)                                                 |
| Oil and fats                    | butter (56%), margarine (44%)                                                             |
| Sugar-sweetened beverages       | squash (27%), cereal drinks (14%), soy drinks (13%)                                       |
| Meat mixed dishes               | chicken fried in chilli (40%), chicken curry (18%), chicken rendang (14%)                 |
| Fried vegetables                | fried spinach (22%), fried long beans (20%), fried cabbage (20%), fried beansprouts (13%) |
| Breakfast cereals               | koko crunch cereal (60%), rice porridge (9%)                                              |
| Malaysian kuih (low ED<11.2)    | deep fried banana fritters or doughballs (33%), glutinous rice (14%)                      |
| Fresh fruit                     | apples (42%), watermelon (12%)                                                            |
| Soups                           | noodle soup (41%), chicken soup (7%)                                                      |
| Vegetables (Raw or boiled)      | sauté spinach (24%), cabbage (19%), Chinese mustard leaves (18%)                          |
| Fish mixed dishes               | mackerel cooked in sauce (32%), prawns cooked in chilli (14%), tuna in mayonnaise (13%)   |
| Processed meat                  | hot dog (45%), sausages (27%), chicken burger (14%)                                       |
| Low fat milk                    | low-fat milk (76%)                                                                        |
| Coated or breaded meat and fish | chicken nuggets (90%)                                                                     |
| Fish low fat (<4.6g)            | prawns (29%), fish balls (18%), dried salted fish (14%)                                   |
| Fruit juice                     | orange juice (49%), watermelon juice (26%)                                                |
| Vegetable mixed dishes          | cabbage in coconut milk( 64%), fiddlehead fern in coconut milk (25%)                      |
| Fried/roast potatoes and chips  | chips (84%)                                                                               |
| Other fruit                     | raisins (100%)                                                                            |
| Cheese                          | cheddar (100%)                                                                            |
| Crisps and savoury snacks       | fried fish crackers (57%)                                                                 |
| Nuts and seeds                  | groundnuts (pagoda) (100%)                                                                |

|                  |                                                                        |
|------------------|------------------------------------------------------------------------|
| Meat substitutes | soybean curd (50%), egg soybean curd in oyster sauce (33%)             |
| Legumes          | baked beans (50%), red gram (25%)                                      |
| Puddings         | cheese cake (25%), banana pancake (25%), steamed pumpkin parcels (25%) |
| Cooked potatoes  | potatoes (67%)                                                         |
| Ice-creams       | chocolate ice cream (100%)                                             |
| Pizza            | pizza (100%)                                                           |
| Water            | coconut water (100%)                                                   |
| Yoghurts         | yoghurt drink (100%)                                                   |
